# Supplementary material
Source: PubMed Central journal article supplement (PMC5101013)

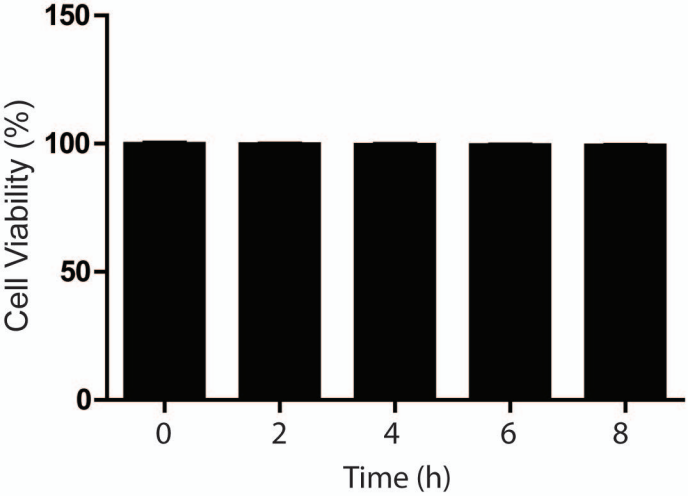

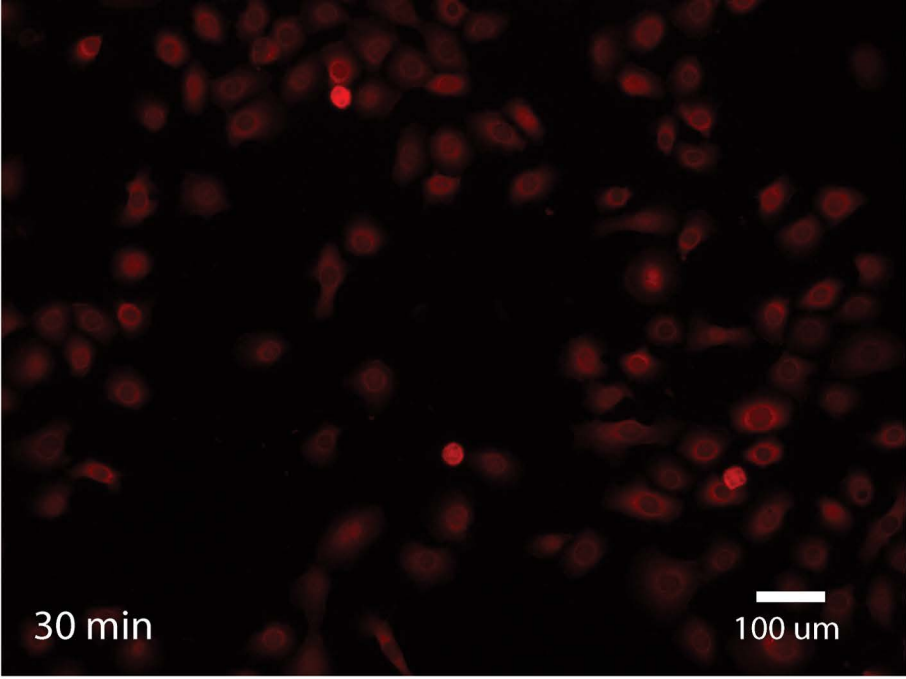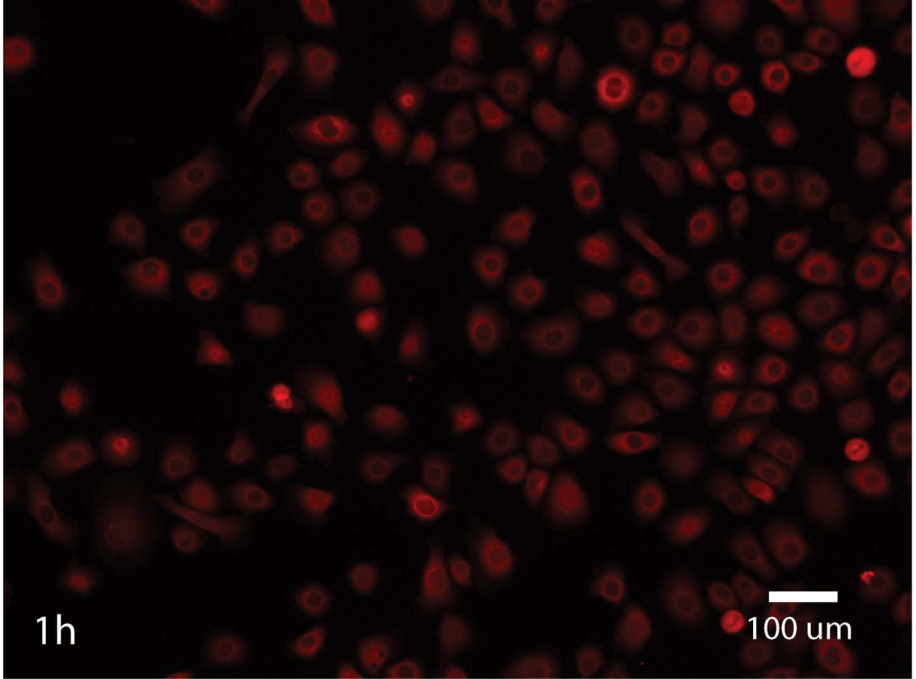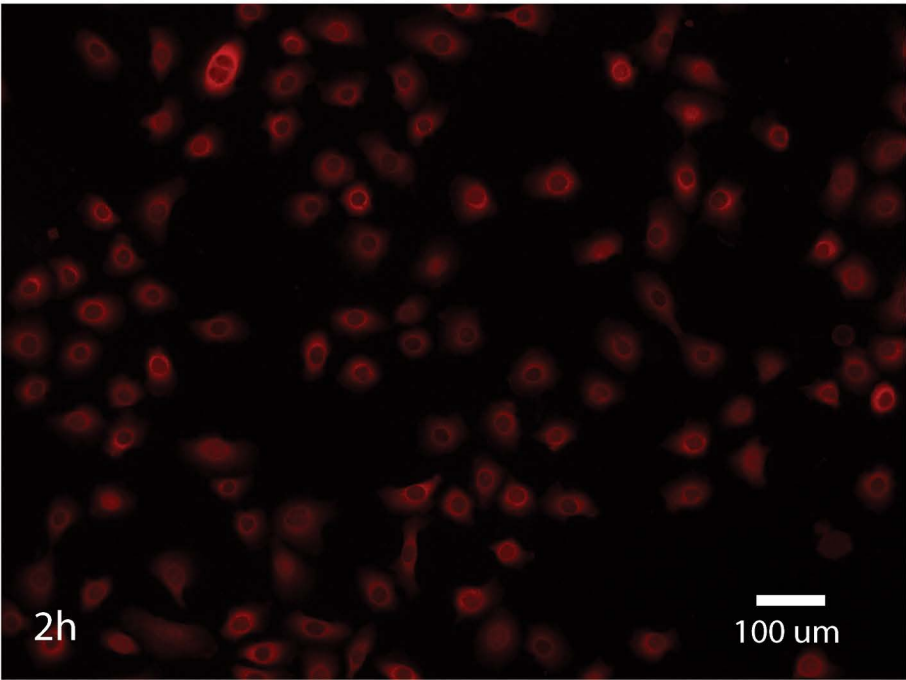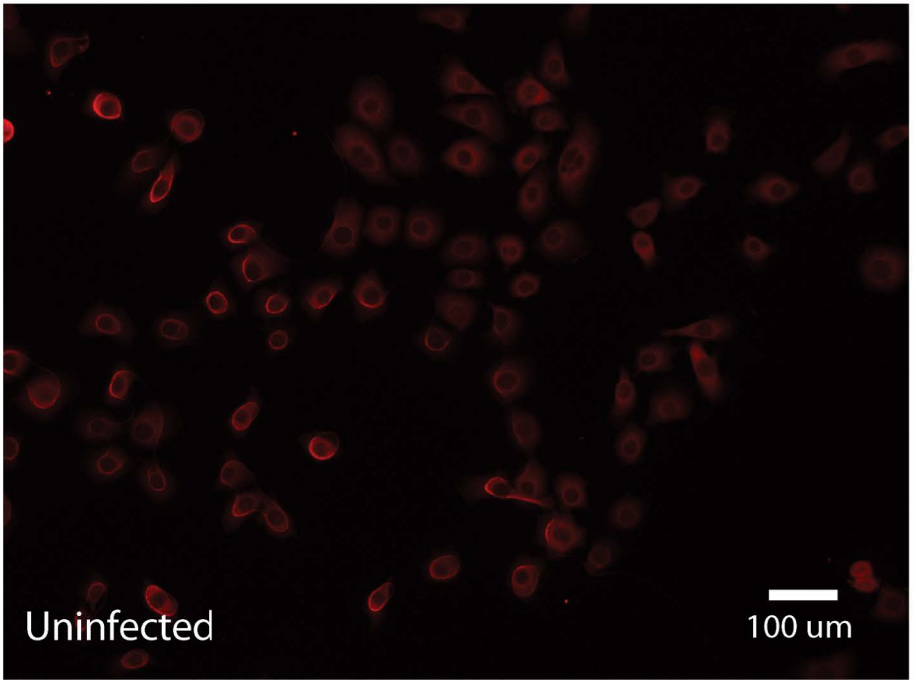

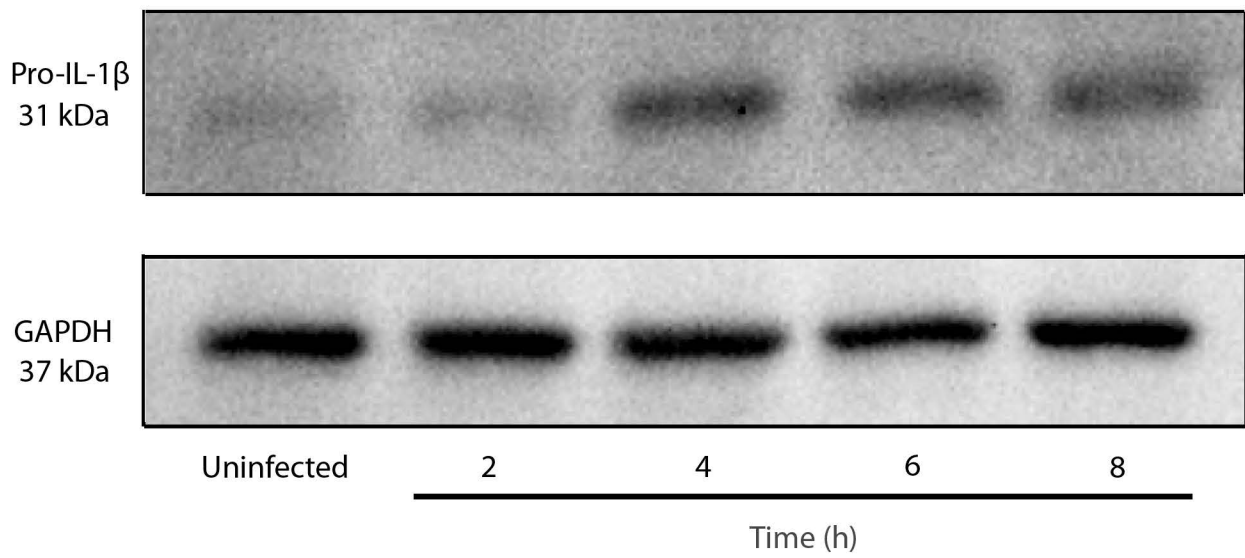

NLRP3  
117 kDa

Actin

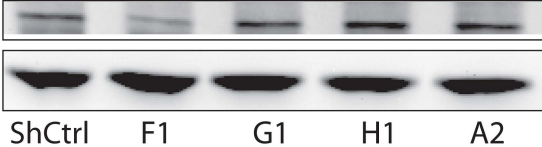

Relative Protein Levels (%)

150  
100  
50  
0

ShCtrl

F1

G1

H1

A2

Supplement: NIHMS826403-supplement-supplementaldata.pdf [file NIHMS826403-supplement-supplementaldata.pdf]
